# Supplementary material
Source: PubMed Central journal article supplement (PMC4790383)
Supplement: antibiotics-03-00617-s001.pdf [file antibiotics-03-00617-s001.pdf]

## Supplementary Material

**Supplementary Figure S1.** Membrane potential of *S. aureus* SG511-Berlin in half-concentrated MHB in absence (A) and presence (B) of 10 mM glucose. RTDs were added in concentrations corresponding to  $10\times$  MIC. The pore-forming peptide nisin was used as a control. Arrows indicate the moment of peptide addition.

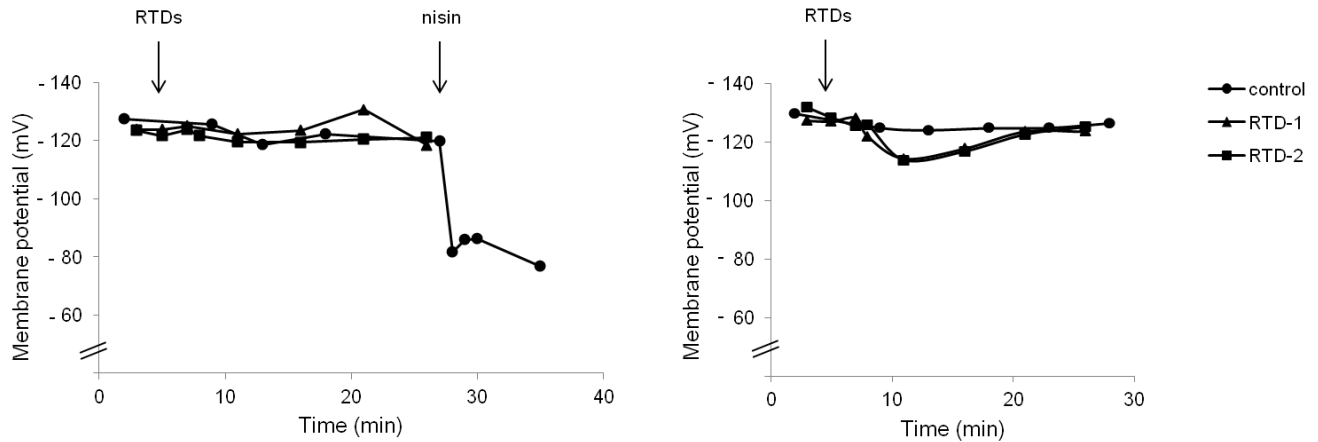

**Supplementary Figure S2.** Localization of Pep5-Cy3 in *S. aureus* SA113. Cells were grown to exponential phase, incubated with Pep5-Cy3 for 5 min and inspected by fluorescence microscopy.

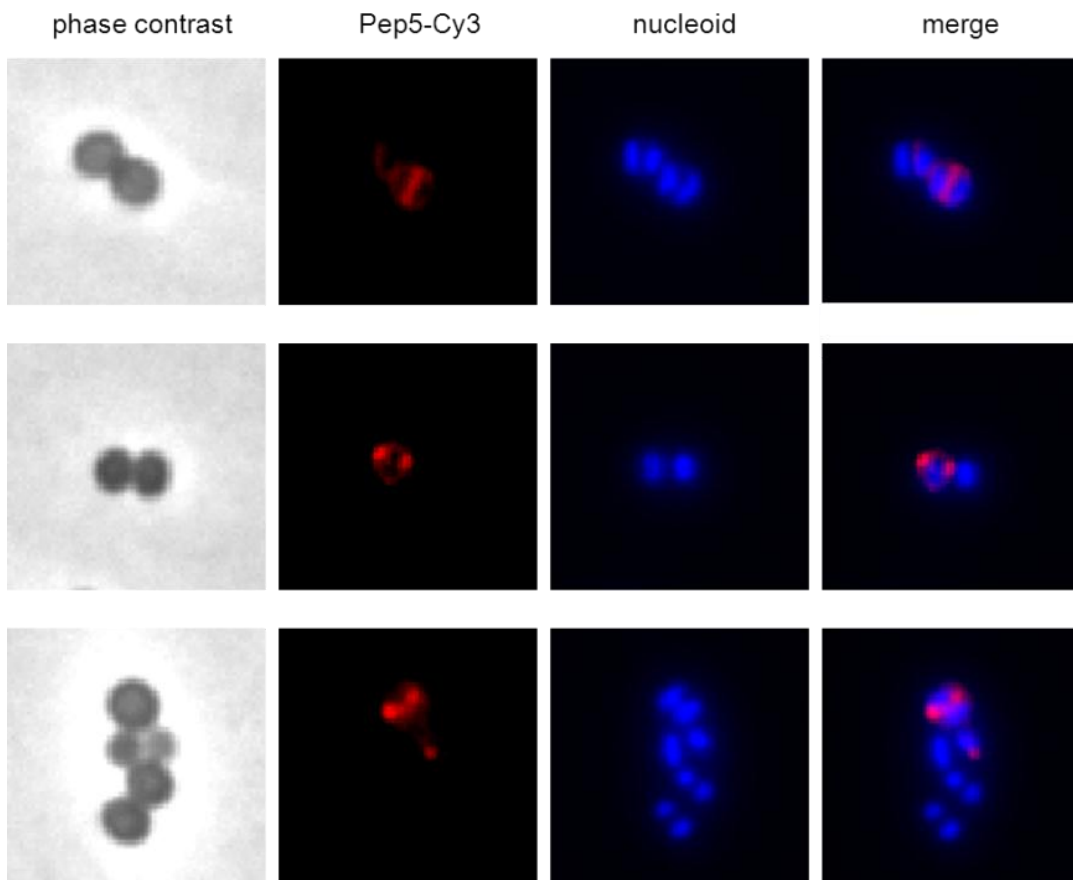

**Supplementary Figure S3.** Carboxyfluorescein (CF) release from liposomes made of DOPC and 0.5 mol% LTA. RTDs (**A**) and Pep5 (**B**) were added at 1  $\mu$ M. Marker release was expressed relative to the amount of CF released after addition of Triton X-100 (100% efflux). Pure DOPC vesicles were used as a control.

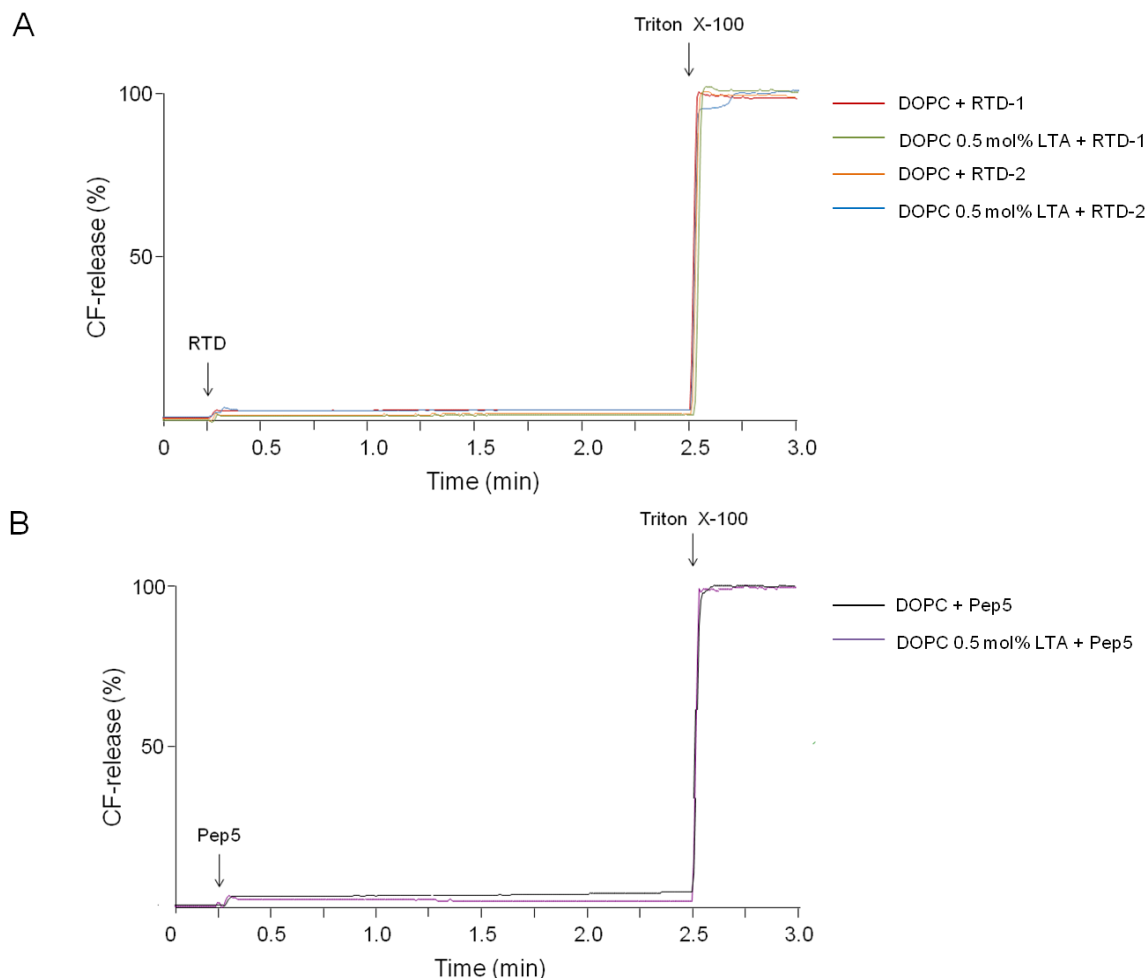

**Supplementary Figure S4.** Transmission electron microscopy of *E. coli* BW25113 treated with 10 $\times$  MIC RTD-2. (**A**) Untreated control cells; (**B**) Cells treated for 15 min; (**C**) Cells treated for 30 min. Scale bar: 0.5  $\mu$ m.

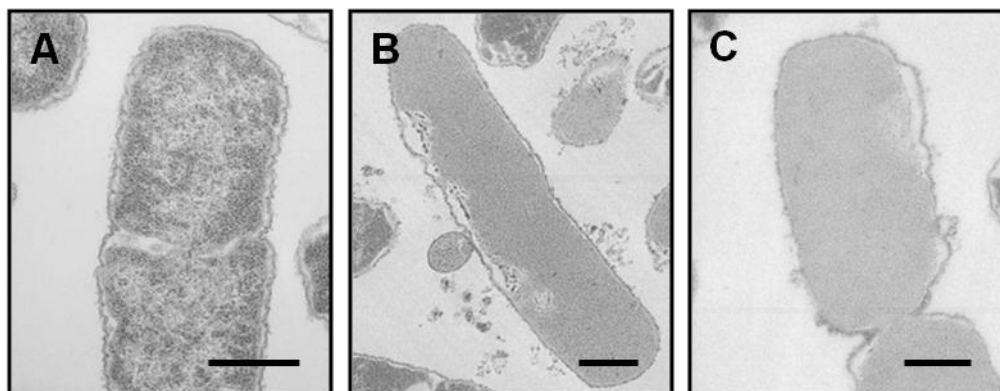

## Supplementary Experimental Methods

Supplementary Table S1. Strains used in this study.

| Strain                                     | Relevant characteristic(s)                                                         | Reference/Source |
|--------------------------------------------|------------------------------------------------------------------------------------|------------------|
| <i>S. aureus</i> SG511-Berlin              | Mutation in gene <i>graS</i>                                                       | [1]              |
| <i>S. aureus</i> SA113                     | Derivative of <i>S. aureus</i> NCTC 8325                                           | [2]              |
| <i>S. aureus</i> SA113 $\Delta$ <i>atl</i> | <i>atlA</i> deletion mutant of strain SA113 ( $\Delta$ <i>atlA</i> :: <i>spc</i> ) | [3]              |
| <i>S. simulans</i> 22                      | Indicator strain                                                                   | [4]              |
| <i>S. carnosus</i> TM300                   | Indicator strain                                                                   | [5]              |
| <i>E. coli</i> BW25113                     | K-12 strain                                                                        | [6]              |

*CF Efflux*

Vesicles were made of pure DOPC (1,2-dioleoyl-sn-glycero-3-phosphocholine; Avanti polar lipids, Alabaster, AL, USA) or DOPC supplemented with 0.5 mol% LTA (Sigma-Aldrich, Taufkirchen, Germany) referring to the total amount of phospholipids. For this, 4  $\mu$ M DOPC were mixed with LTA and the solvent was evaporated under a nitrogen stream. Then, the lipids were resuspended in 600  $\mu$ L buffer (50 mM MES-KOH; 100 mM K<sub>2</sub>SO<sub>4</sub>; pH 6 or 10 mM Tris-HCl; 0.85% NaCl; pH 7.2) containing 50 mM carboxyfluorescein (CF). Unilamellar vesicles were prepared by the extrusion technique (polycarbonate filter, pore size 0.4  $\mu$ m; Whatman<sup>TM</sup>, Dassel, Germany). Liposomes were separated from unencapsulated CF by gel filtration using sephadex G-50 (Sigma-Aldrich).

The CF-loaded vesicles were diluted in 1.5 mL buffer (see above) at a final concentration of 25  $\mu$ M phospholipid on a phosphorous base. The fluorescence intensity was measured at 520 nm (excitation at 492 nm) on a RF-5301 spectrophotometer (Shimadzu, Duisburg, Germany) for 3 min at RT. Peptides were added after 25 s at concentrations of 1  $\mu$ M. To determine 100% marker release, 20  $\mu$ L of 20% Triton X-100 (v/v) were added at the end of each measurement.

*Fluorescence Microscopy*

Pep5 was fluorescently labeled using the Cy3 Mono Reactive Dye Pack (GE Healthcar, Buckinghamshire, UK) according to the manufacturer's instructions.

For localization of Pep5, *S. aureus* SA113 was grown to mid-exponential phase, incubated with Pep5-Cy3 and DAPI (4',6-Diamidin-2-phenylindol; 0.25  $\mu$ g/mL) for 5 min at 37 °C and subsequently washed three times with SPB (10 mM, pH 7.5). Then, 10  $\mu$ L of cell suspension were applied on glass slides covered with 1% agarose and examined with a DMRB fluorescence microscope (Leica, Wetzlar, Germany).

## References

1. Sass, P.; Bierbaum, G. Native *graS* mutation supports the susceptibility of *Staphylococcus aureus* strain SG511 to antimicrobial peptides. *Int. J. Med. Microbiol.* **2009**, *299*, 313–322.
2. Iordanescu, S.; Surdeanu, M. Two restriction and modification systems in *Staphylococcus aureus* NCTC8325. *J. Gen. Microbiol.* **1976**, *96*, 277–281.
3. Biswas, R.; Voggu, L.; Simon, U.K.; Hentschel, P.; Thumm, G.; Gotz, F. Activity of the major staphylococcal autolysin Atl. *FEMS Microbiol. Lett.* **2006**, *259*, 260–268.
4. Sahl, H.G.; Brandis, H. Production, purification and chemical properties of an antistaphylococcal agent produced by *Staphylococcus epidermidis*. *J. Gen. Microbiol.* **1981**, *127*, 377–384.
5. Schleifer, K.H.; Fischer, U. Description of a new species of the genus *Staphylococcus*: *Staphylococcus carnosus*. *Int. J. System. Bacteriol.* **1983**, *32*, 153–156.
6. Datsenko, K.A.; Wanner, B.L. One-step inactivation of chromosomal genes in *Escherichia coli* K-12 using PCR products. *Proc. Natl. Acad. Sci. USA* **2000**, *97*, 6640–6645.

© 2014 by the authors; licensee MDPI, Basel, Switzerland. This article is an open access article distributed under the terms and conditions of the Creative Commons Attribution license (<http://creativecommons.org/licenses/by/4.0/>).
